# Supplementary material
Source: PubMed Central journal article supplement (PMC2744648)
Supplement: NIHMS86387-supplement-1_si_001.pdf [file NIHMS86387-supplement-1_si_001.pdf]

# A copper(I)-catalyzed 1,2,3-triazole azide-alkyne click compound, is a potent inhibitor of a multidrug-resistant HIV-1 protease variant

*Michael J. Giffin<sup>1\*</sup>, Holly Heaslet<sup>2\*#</sup>, Ashraf Brik<sup>3^</sup>, Ying-Chuan Lin<sup>2</sup>, Gabrielle Cauvi<sup>1</sup>, Chi-Huey Wong<sup>3</sup>, Duncan E. McRee<sup>4</sup>, John H. Elder<sup>2</sup>, C. David Stout<sup>2</sup>, and Bruce E. Torbett<sup>1¶</sup>*

## **Supporting Information**

**FIGURE S1**

**2**

**Figure S1**

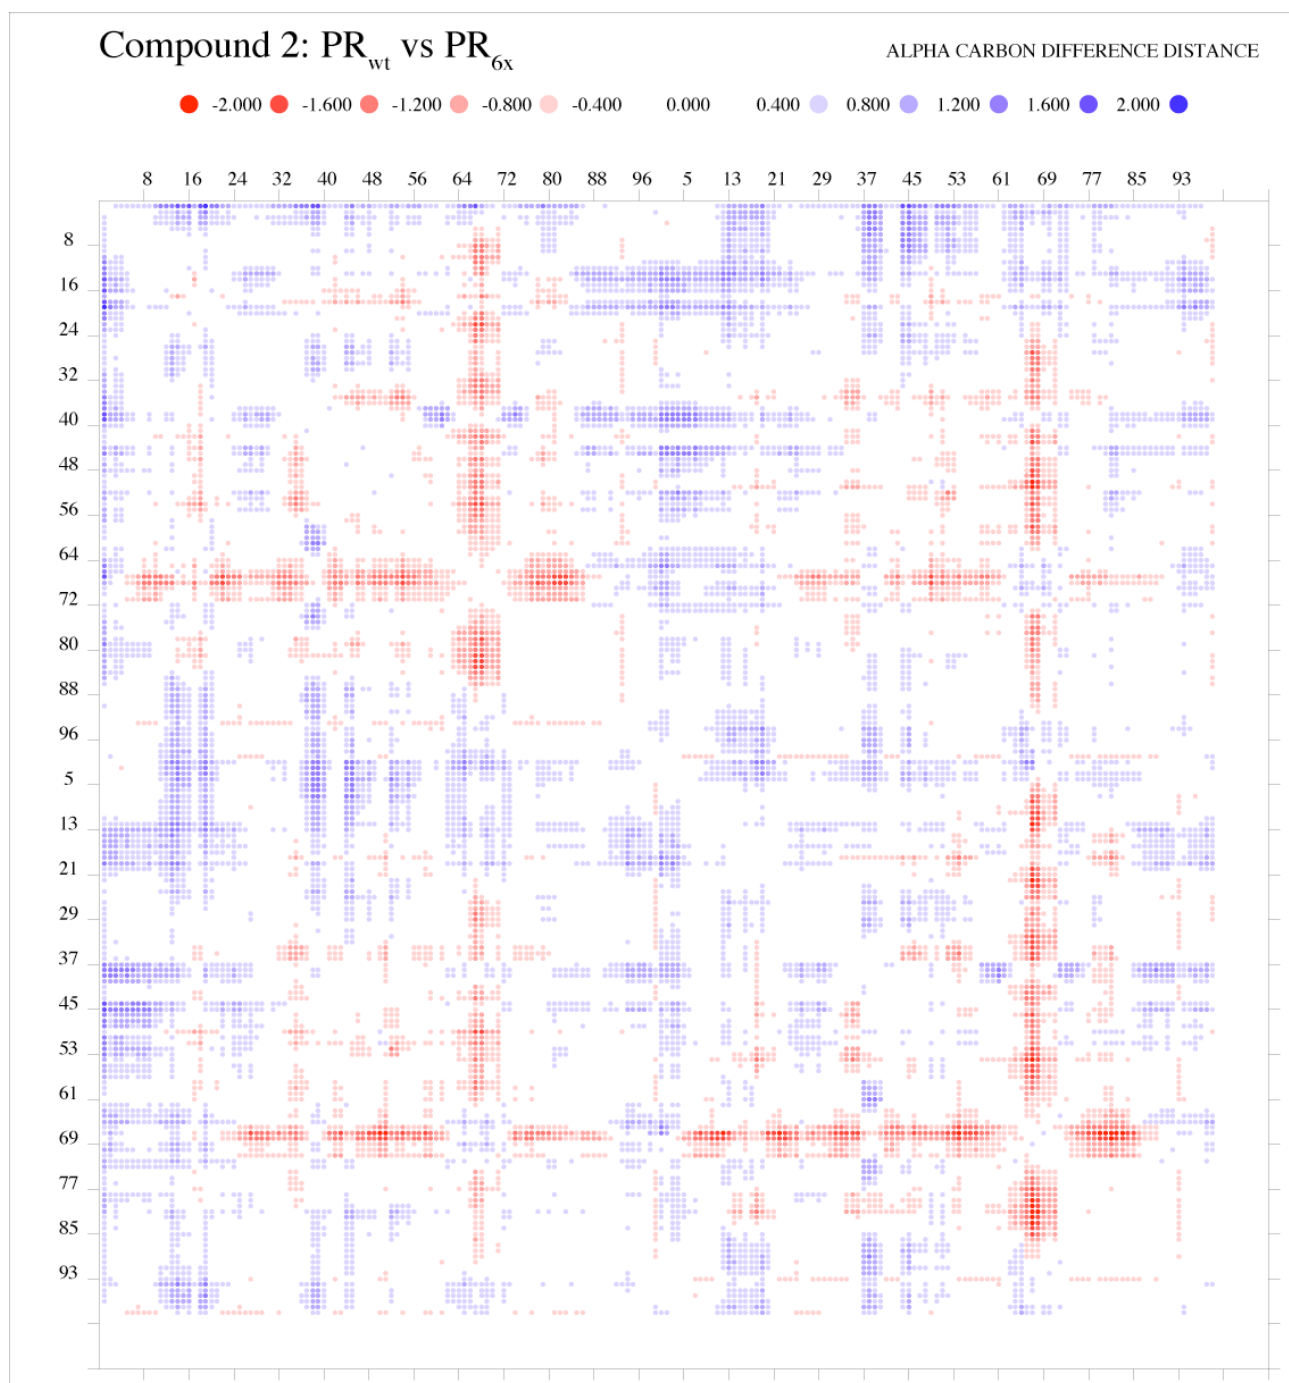

**Figure S1.** Difference distance matrix comparing relative positions of C $\alpha$  atoms in the PR<sub>wt</sub>-compound **2** structure to the PR<sub>6x</sub>-compound **2** structure. Residue numbers are listed sequentially for each monomer. Observed movements are of a much smaller magnitude than was seen in the PR<sub>6x</sub>-compound **1** structure, and confined to areas that show similar movements between different wild-type structures.
